1 **DEFINED DIETS FOR FRESHWATER PLANARIANS**

2  
3 Chris Abel, Kaleigh Powers, Gargi Gurung, Jason Pellettieri<sup>1</sup>

4  
5 Department of Biology, Keene State College, Keene, NH, USA

6 <sup>1</sup>Corresponding author: [jpellettieri@keene.edu](mailto:jpellettieri@keene.edu)

7  
8  
9 **ABSTRACT**

10 Planarian flatworms are popular invertebrate models for basic research on stem cell  
11 biology and regeneration. These animals are commonly maintained on a diet of homogenized  
12 calf liver or boiled egg yolk in the laboratory, introducing a source of uncontrolled experimental  
13 variability. Here, we report the development of defined diets, prepared entirely from  
14 standardized, commercially sourced ingredients, for the freshwater species *Schmidtea*  
15 *mediterranea*, *Dugesia japonica*, and *Girardia dorocephala*. These food sources provide an  
16 opportunity to test the effects of specific nutritional variables on biological phenomena of  
17 interest. Defined diet consumption was not sufficient for growth and only partially induced the  
18 increase in stem cell division that normally accompanies feeding, suggesting these responses  
19 are not solely determined by caloric intake. While our defined diet formulations do not support  
20 long-term planarian maintenance, they do enable delivery of double-stranded RNA for gene  
21 knockdown in a manner that provides unique advantages in some experimental contexts. We  
22 also present a new approach for preserving tissue integrity during hydrogen peroxide bleaching  
23 of liver-fed animals. These tools will empower research on the connections between diet,  
24 metabolism, and stem cell biology in the experimentally tractable planarian system.

25  
26  
27 **KEY WORDS:** flatworms, nutrition, feeding, stem cells

## 28 INTRODUCTION

29 Freshwater planarians have long been recognized for their remarkable ability to  
30 regenerate any lost body part, and the recent application of experimental tools like RNA  
31 interference (RNAi) and RNA sequencing has led to a better mechanistic understanding of this  
32 process (Newmark & Sánchez Alvarado, 2002; Ivankovic et al., 2019). Most notably, we now  
33 know far more about the adult stem cells, or ‘neoblasts,’ that drive formation of new tissue at  
34 sites of amputation (Reddien, 2018; Dattani et al., 2019). Under homeostatic conditions, these  
35 cells remain mitotically active to enable a high rate of physiological cell turnover. Following  
36 injury, they increase their rate of division and migrate to the wound site, where they give rise to  
37 a mass of undifferentiated tissue called the blastema that subsequently differentiates to  
38 restore a complete and functional anatomy.

39 Neoblasts are also responsive to nutritional cues, increasing their rate of division within  
40 hours of feeding and remaining in a state of heightened proliferation for up to a few days  
41 (Baguñà, 1974; Baguñà, 1976; Baguñà & Romero, 1981; Salò and Baguñà, 1984; Newmark &  
42 Sánchez Alvarado, 2000; Kang & Sánchez Alvarado, 2009; González-Estévez et al., 2012;  
43 Pascual-Carreras et al., 2020). In asexual strains of freshwater species like *S. mediterranea*,  
44 *D. japonica*, and *G. dorotocephala*, accompanying organismal growth eventually leads to  
45 reproduction via binary fission (Vila-Farré & Rink, 2018). During prolonged starvation,  
46 planarians undergo a more than 40-fold reduction in overall size, a process historically termed  
47 ‘degrowth’ (Baguñà et al., 1990; Newmark & Sánchez Alvarado, 2002). This response is  
48 primarily attributed to a change in cell number, rather than a change in cell size – neoblasts do  
49 not alter their rate of mitosis, but their differentiating division progeny decrease in number  
50 while the rate of cell death rises (Baguñà, 1976; Pellettieri et al., 2010; González-Estévez et al.,  
51 2012; Thommen et al., 2019). Animals retain anatomical scale and proportion as they shrink,  
52 both at the organismal level and with respect to specific differentiated tissues and cell types  
53 (Oviedo et al., 2003; Takeda et al., 2009; Pellettieri et al., 2010; Forsthoefel et al., 2011). These  
54 observations point to the existence of mechanisms coordinating stem cell division, cell death,  
55 and organismal growth. Although recent studies have revealed some of the genetic pathways  
56 that control these processes (Oviedo et al., 2008a; Bender et al., 2012; Miller & Newmark,

57 2012; Peiris et al., 2012; Tu et al., 2012; Almuedo-Castillo et al., 2014; Lin & Pearson, 2014; Lin  
58 & Pearson, 2017; de Sousa et al., 2018; Arnold et al., 2019; Pascual-Carreras et al., 2020; Schad  
59 & Petersen, 2020; Ziman et al., 2020), it is not yet clear how cell number is “counted” or  
60 attuned to metabolic cues to effect rapid transitions between growth and degrowth.

61 Planarians are carnivores. In the wild, they are reported to consume living or recently  
62 dead arthropods (e.g., insect larvae and crustaceans), annelids (e.g., oligochaetes), and  
63 molluscs (e.g., gastropods) (Jennings, 1957; Reynoldson & Young, 1963; Pickavance, 1971;  
64 Boddington & Mettrick, 1974; Reynoldson & Sefton, 1976; Armitage & Young, 1990; Gee &  
65 Young, 1993; Calow et al., 2009; Vila-Farré & Rink, 2018; Cuevas-Caballé et al., 2019). Some  
66 species may use their mucus secretions to entrap prey (Jennings, 1957). Once a food item is  
67 encountered, the cylindrical pharynx is extended through a ventral opening in the body wall.  
68 The peristaltic activity of the pharyngeal muscles then draws tissues and body fluids from the  
69 animal on which the planarian is feeding into the highly branched gut, where absorptive  
70 phagocytes internalize and break down the material to fuel anabolic processes (Ishii & Sakurai,  
71 1991; Adler et al., 2014; Forsthoefel et al., 2020). Undigested food is eliminated through the  
72 pharynx, while a protonephridial system allows for excretion of fluid waste (Hertel, 1993; Rink  
73 et al., 2011; Scimone et al., 2011).

74 Freshwater planarians used in stem cell and regeneration research are typically  
75 maintained on a diet of homogenized calf liver or boiled egg yolk in the laboratory (Oviedo et  
76 al., 2008b; Accorsi et al., 2017; Merryman et al., 2018). Although these diets are inexpensive,  
77 relatively easy to prepare, and promote rapid growth, their lack of standardization introduces  
78 an uncontrolled source of variability, both within and between research groups. This is a  
79 particular concern in studies addressing links between nutrition and physiology. Furthermore,  
80 such non-defined (oligidic) diets afford only limited potential for experimental manipulation of  
81 nutritional variables. To address these concerns, we have developed meridic diets, prepared  
82 almost entirely from chemically defined ingredients, and used them to begin analyzing the  
83 nutritional basis for the mitogenic effect of feeding. We show that defined diet consumption is  
84 sufficient for partial induction of neoblast proliferation, but not to support overall organismal  
85 growth. Thus, like defined diets previously developed for *Drosophila melanogaster* and

86 *Caenorhabditis elegans*, the formulations we describe here for planarians are not optimal for  
87 long-term propagation of laboratory populations (Lüersen et al., 2019; Zečić et al., 2019).  
88 Nevertheless, we expect them to prove similarly useful in empowering research on the  
89 relationships between nutrition, metabolism, and the biological phenomena for which these  
90 experimentally tractable systems are so well known.

91

## 92 **RESULTS AND DISCUSSION**

93

### 94 **Development and characterization of defined diets**

95 In an effort to develop a simple, standardized food source for freshwater planarians, we  
96 prepared defined diets from commercially sourced ingredients and tested their ability to  
97 stimulate feeding behavior. Our formulations were based upon a nutritional analysis of beef  
98 liver (Haytowitz et al., 2019), with adjustments to the concentrations of some ingredients to  
99 maintain solubility or promote feeding. Through this empirical approach, we arrived at two  
100 diets, hereafter referred to as complex and minimal. The former consists of the 20 standard  
101 amino acids, dextrose, glycogen, lecithin, and xanthan gum as a thickener; the latter consists  
102 only of lecithin and xanthan gum (Table 1; Materials and Methods).

103 Starved *S. mediterranea*, *D. japonica*, and *G. dorotocephala* all consumed both the  
104 complex and minimal diets under ad libitum feeding conditions (Materials and Methods),  
105 though the percentage of animals that ate and the amount of food consumed was not as high  
106 as for liver (Figure 1; Figure S1). Because it was particularly difficult to induce long-term feeding  
107 with the minimal diet (Figure 1B), our use of this formulation in follow-up experiments was  
108 restricted to those cases in which the effects of a single feeding were analyzed. Together, the  
109 complex and minimal diets allow for complementary approaches to studying the impacts of  
110 nutritional cues on planarian biology – ingredients can be subtracted from the complex diet in  
111 order to determine whether they are necessary for phenomena of interest and/or added to the  
112 minimal diet in order to determine whether they are sufficient. For example, supplementing  
113 the minimal diet (or xanthan gum alone) may represent a useful strategy for identifying  
114 additional chemoattractants that, like lecithin, stimulate feeding behavior.

## 115 **Growth and stem cell proliferation are not solely determined by caloric intake**

116 To assess whether the complex diet could substitute for liver in the long-term laboratory  
117 propagation of *S. mediterranea*, we compared the ability of these two food sources to induce  
118 overall growth in size-matched animals. While feeding every other day with liver led to a rapid  
119 increase in animal area, followed by fission, animals fed on the same schedule with the complex  
120 diet displayed a gradual reduction in size (Figure 2A). This decline was not as pronounced as  
121 that observed in starved controls, however, indicating the complex diet has at least some  
122 nutritional value. 20% of animals maintained on the complex diet began to develop lesions and  
123 lyse beyond 25 feedings (50 days). This was not observed in the starved controls, potentially  
124 indicating that specific ingredients or altered nutrient ratios in the complex diet suppress  
125 catabolic processes necessary for survival or become toxic in the context of degrowth (Wulzen  
126 & Bahrs, 1931). We also evaluated whether our defined diet formulations could trigger the  
127 increase in stem cell division that normally occurs after feeding, using phosphorylated-histone  
128 H3 (H3P) immunostaining (Newmark & Sánchez Alvarado, 2000) (Materials and Methods). Liver  
129 consumption resulted in a slightly more than two-fold increase in H3P+ cells 24 hours after a  
130 single feeding (Figure 2B,C). Consumption of the minimal or complex diets also induced stem  
131 cell division, but to a significantly lower extent.

132 The caloric content of beef liver is approximately 1.5 kcal/ml (1.4 kcal/g) (Haytowitz et  
133 al., 2019). By comparison, we estimated the minimal and complex diets contain only 0.7 and 0.9  
134 kcal/ml, respectively, with their overall nutritional values being further diminished by their  
135 reduced rates of consumption (Figure 1D). Thus, we reasoned differences in growth/degrowth  
136 and feeding-induced neoblast division in the above experiments might simply be due to  
137 differences in total caloric intake. To address this possibility, we next tested the effect of  
138 doubling the caloric value of the complex diet via addition of 0.45 kcal/ml each casein and  
139 dextrose. This modification did not significantly impact the amount of food consumed (Figure  
140 2D), indicating it also increased total caloric intake by approximately two-fold. Yet it still failed  
141 to induce growth, or even to slow the rate of degrowth (Figure 2E), and increased stem cell  
142 division at 24 hours post-feeding by only 13% (Figure 2F).

143           We cannot presently exclude the possibility that our defined diet formulations interfere  
144 with digestion or nutrient uptake. However, the small but significant impacts these food  
145 sources had on both animal size and neoblast division argue against complete malabsorption  
146 (Figure 2A-C). Furthermore, substitution of other thickening agents for xanthan gum in the  
147 complex diet had no discernable effect on the rate of degrowth (Table S1). Taken together,  
148 then, our results suggest total caloric intake is not the sole determinant of changes in animal  
149 size and stem cell division after feeding and are consistent with the possibility that liver  
150 contains unrecognized nutrients necessary for growth and capable of stimulating neoblast  
151 proliferation. In an effort to identify such hypothesized “missing ingredients,” we proceeded to  
152 screen over 40 different salts, vitamins, lipids, and other organic molecules, alone and in  
153 combination, for growth-promoting effects when added to the complex diet (Table S2). None  
154 had a visible impact. A definitive explanation for why *S. mediterranea* responds differently to  
155 consumption of oligidic and defined food sources, as well as development of a standardized  
156 laboratory diet capable of supporting long-term planarian maintenance, awaits further  
157 experimentation.

158

### 159 **Defined diets enable dsRNA delivery for gene knockdown**

160           Planarians were one of the first animals in which gene expression was silenced by RNA  
161 interference after its discovery in *C. elegans*, and this technique has emerged as a powerful tool  
162 for studying gene function in numerous aspects of their biology (Fire et al., 1998; Sánchez  
163 Alvarado & Newmark, 1999; Reddien et al., 2005). dsRNA can be delivered via soaking or  
164 injection, or by feeding with either in vitro-transcribed dsRNA or dsRNA-expressing bacteria  
165 (Newmark et al., 2003; Orii et al., 2003; Rouhana et al., 2013; Adler & Sánchez Alvarado, 2018;  
166 Shibata & Agata, 2018). Many planarian investigators utilize RNAi feeding approaches because  
167 they combine the ease of soaking with the robustness of injection (Rouhana et al., 2013).

168           To assess the utility of the defined diets in RNAi feeding experiments, we compared  
169 their ability to induce previously documented phenotypes with that of the standard feeding  
170 approach (Materials and Methods). RNAi knockdown of the porphyrin biosynthesis enzyme  
171 *porphobilinogen deaminase-1 (PBGD-1)* prevents pigment biosynthesis in newly regenerated

172 tissue (Stubenhaus et al., 2016). We found that a single RNAi feeding using either the complex  
173 or minimal diet was as effective in generating this phenotype as feeding with liver (Figure 3A).  
174 In order to compare phenotypic penetrance and expressivity, we next targeted the Wnt  
175 signaling component *β-catenin-1* and the exon junction complex subunit *magoh*. Knockdown of  
176 these genes results in the regeneration of two-headed animals from trunk fragments and stem  
177 cell loss in intact animals, respectively (Gurley et al., 2008; Petersen et al., 2008; Kimball et al.,  
178 2020). We did not observe a significant difference in the percentage of two-headed animals or  
179 the extent of stem cell depletion when comparing RNAi feeding for these genes using the  
180 complex diet versus feeding with liver (Figure 3B-D). These results demonstrate that both  
181 defined diets provide effective delivery mechanisms for dsRNA and reinforce the conclusion  
182 that ingested material is absorbed.

183         The ability to silence gene expression using the defined diets could offer important  
184 advantages over existing approaches in some experimental contexts. First, all previously  
185 described methods for dsRNA delivery provoke a more than two-fold increase in stem cell  
186 division as part of the normal responses to feeding (see above) or to injury (i.e. poke wounds  
187 produced by injection or amputations necessary for efficient gene knockdown by soaking)  
188 (Wenemoser & Reddien, 2010). Because the defined diets more modestly induce stem cell  
189 proliferation (Figure 2B,C), they provide an opportunity to achieve gene knockdown without as  
190 strongly impacting the homeostatic rate of neoblast division. Second, defined diet feeding  
191 allows for the easy introduction of dsRNA in the absence of contaminating bovine RNA (or DNA)  
192 from liver. This may be particularly advantageous in RNA-Seq experiments involving time points  
193 shortly after feeding. Third, the complex diet provides a means for rapid and repeated dsRNA  
194 delivery in the absence of organismal growth. This could be useful in experiments involving  
195 whole-mount labeling of RNAi animals by immunostaining, in situ hybridization, or TUNEL, all of  
196 which are typically more effective in smaller specimens (Brown & Pearson, 2015; Forsthoefel et  
197 al., 2018; Stubenhaus & Pellettieri, 2018). The above advantages may also apply to situations  
198 where delivery of other substances, such as nucleotide analogs used for stem cell labeling, is  
199 desired (Cheng & Sánchez Alvarado, 2018).

## 200 **Na azide treatment enables hydrogen peroxide bleaching of liver-fed animals**

201           In the course of completing this line of research, we frequently encountered difficulties  
202 when attempting to fix liver-fed animals shortly after feeding. Specifically, we found that  
203 hydrogen peroxide used as a bleaching agent (Newmark & Sánchez Alvarado, 2000; Brown &  
204 Pearson, 2015; Forsthoefel et al., 2018) reacted with ingested liver to generate gas that  
205 damaged or destroyed specimens. We hypothesized this might be due to the high catalase  
206 activity present in liver and therefore tested whether the catalase inhibitor sodium azide might  
207 preserve tissue integrity during bleaching. Treatment with 1% sodium azide had the desired  
208 effect (Materials and Methods), eliminating visible gas production and allowing for H3P and in  
209 situ hybridization labeling in undamaged animals at one hour post-feeding (Figure 4). Animals  
210 fed the defined diets were effectively bleached and labeled without this modification.

211

## 212 **Conclusions**

213           Nutritional studies in model organisms have historically focused on rodents, but  
214 experimentally accessible invertebrates such as *Drosophila* and *C. elegans* have recently  
215 assumed a more prominent role in the field. With their wealth of genetic tools, these systems  
216 are providing new mechanistic insight into topics such as feeding behavior, diet-disease  
217 interactions, and the links between metabolism and aging (Kapahi et al., 2017; Evangelakou et  
218 al., 2019; Zhou et al., 2019; Tierney, 2020). The development of partly or fully defined diets has  
219 played an important role in this work. As we have observed here, these diets are associated  
220 with lower rates of growth, development, and/or fecundity in comparison with oligidic food  
221 sources, limiting their utility in the long-term maintenance of laboratory populations (Lüersen  
222 et al., 2019; Zečić et al., 2019). Despite this drawback, they have proven extremely valuable in  
223 allowing for controlled manipulation of nutritional variables. We likewise expect the future  
224 application of these tools in planarians to bring about new advances in our understanding of  
225 the evolution and function of metabolic control mechanisms governing stem cell biology.



## 226 MATERIALS AND METHODS

227

### 228 Planarian maintenance

229 Clonal, asexual populations of *S. mediterranea* and *D. japonica*, as well as wild-caught  
230 *G. dorotocephala* (Carolina Biological), were maintained under standard laboratory conditions  
231 (Oviedo et al., 2008b; Accorsi et al., 2017; Merryman et al., 2018). Animals were propagated on  
232 a diet of homogenized calf liver with weekly or bi-weekly feedings and then starved for seven  
233 days prior to use in experiments (one month-starved animals were used for the long-term  
234 growth analysis in Figure 2A).

235

### 236 Defined diet preparation and feeding

237 Complex and minimal diets were prepared according to the detailed protocols in  
238 Supplementary Materials and Methods, aliquoted, and stored at -20°C prior to use. Organic calf  
239 liver, used as a control, was homogenized as previously described (Merryman et al., 2018) and  
240 stored at -80°C. All experiments involved ad libitum feeding at room temperature – animals  
241 were allowed a minimum of one hour of unrestricted feeding in petri dishes (beyond this time  
242 point, feeding activity was no longer evident and unconsumed food invariably remained at the  
243 bottom of each dish). Fed animals were rinsed and returned to a 20°C incubator after feeding  
244 or processed and analyzed as indicated below. In all experiments involving multiple feedings,  
245 animals were fed every other day. Except for the long-term area measurements (Figure 2A) and  
246 analyses of relative food consumption (Figures 1C, 1D, and 2D), red or green food coloring was  
247 added to each diet (McCormick, Catalog No. 5210007107; 1 µl per 30 µl of food). This facilitated  
248 identification and removal of any animals that failed to eat (animals failing to eat were *not*  
249 removed for the experiments in Figures 1B, 1D, 2A, and 2D).

250

### 251 Relative food consumption

252 Erioglaurine disodium salt (EDS) was mixed with each diet at a final concentration of  
253 0.2% to enable a quantitative assessment of the relative amounts of food consumed (Ziman et  
254 al., 2020). Briefly, homogenates were prepared from five fed animals per condition in 100 µl of

255 water by maceration with a pipet tip. Remaining tissue was pelleted in a microcentrifuge and  
256 absorbance measurements (620 nm) were obtained from supernatants in a BioTek Synergy HT  
257 plate reader. Negligible absorbance values for xanthan gum-only controls, which were not  
258 consumed, were subtracted from the readings for liver and the defined diets to account for any  
259 trace amounts of EDS absorbed via simple diffusion.

260

## 261 **Microscopy**

262 All planarian photographs were obtained with an Olympus SZX16 stereomicroscope  
263 equipped with a DP72 digital camera. Cropped images of individual animals were placed on  
264 uniform black or white backgrounds to generate figure panels, with identical brightness and  
265 contrast adjustments applied within each experiment. Area measurements were made with  
266 Fiji/Image J (Schindelin et al., 2012).

267

## 268 **H3P immunostaining and WISH**

269 H3P labeling/quantification and *smedwi-1* whole-mount in situ hybridization (WISH)  
270 were performed as previously described (Kimball et al., 2020). Boxplots displaying H3P results,  
271 as well as animal area measurements, were generated in R with PlotsOfData (Postma &  
272 Goedhart, 2019).

273

## 274 **RNA interference**

275 RNAi knockdown experiments involved a standard feeding approach in which dsRNA-  
276 expressing bacteria were fed to animals in a mixture with the defined diets or homogenized calf  
277 liver (Newmark et al., 2003; Accorsi et al., 2017; Kimball et al., 2020). An equivalent amount of  
278 bacterial culture was used to prepare each RNAi food source. The *C. elegans* gene *unc-22* was  
279 employed as a negative control.

280

## 281 **Na azide treatment**

282 Animals fixed within 24 hours of liver consumption were incubated overnight in 1% Na  
283 azide in PBST (1x PBS with 0.3% Triton-X), prior to bleaching overnight in 1% Na azide, 6% H<sub>2</sub>O<sub>2</sub>

284 in PBST. For WISH, these steps were followed by a formamide bleach without Na azide (Pearson  
285 et al., 2009; King et al., 2013).

286 **ACKNOWLEDGEMENTS**

287           We thank J. P. Dustin, M. Ryan Woodcock, and Maggie Rice for assistance with  
288 preliminary experiments, and Shane Miller, Shane Merryman, and Alejandro Sánchez Alvarado  
289 for providing *S. mediterranea*.

290

291 **FUNDING**

292           This work was supported by the National Science Foundation (Award No. 1656793) and  
293 by New Hampshire-INBRE through an Institutional Development Award (P20GM103506) from  
294 the National Institute of General Medical Sciences of the National Institutes of Health.

295

296 **COMPETING INTERESTS**

297           The authors declare no competing or financial interests.

298

299 **AUTHOR CONTRIBUTIONS**

300           Project conception and design: C.A., J.P.; acquisition of data: C.A., K.P., G.G.; analysis  
301 and interpretation of data: C.A., K.P., G.G., J.P.; writing the manuscript: J.P.

302 **REFERENCES**

- 303 Accorsi A, Williams MM, Ross EJ, Robb SMC, Elliott SA, Tu KC, Sánchez Alvarado A. 2017. Hands-  
304 on classroom activities for exploring regeneration and stem cell biology with planarians.  
305 *Am Biol Teach* **79**:208–223.
- 306 Adler CE, Sánchez Alvarado A. 2018. Systemic RNA interference in planarians by feeding of  
307 dsRNA containing bacteria. *Methods in Molecular Biology*. Humana Press Inc. pp. 445–454.
- 308 Adler CE, Seidel CW, McKinney SA, Sánchez Alvarado A. 2014. Selective amputation of the  
309 pharynx identifies a FoxA-dependent regeneration program in planaria. *Elife* **3**:e02238.
- 310 Almuedo-Castillo M, Crespo X, Seebeck F, Bartscherer K, Salò E, Adell T. 2014. JNK controls the  
311 onset of mitosis in planarian stem cells and triggers apoptotic cell death required for  
312 regeneration and remodeling. *PLoS Genet* **10**:e1004400.
- 313 Armitage MJ, Young JO. 1990. The realized food niches of three species of stream-dwelling  
314 triclads (Turbellaria). *Freshw Biol* **24**:93–100.
- 315 Arnold CP, Benham-Pyle BW, Lange JJ, Wood CJ, Sánchez Alvarado A. 2019. Wnt and TGFβ  
316 coordinate growth and patterning to regulate size-dependent behaviour. *Nature* **572**:655–  
317 659.
- 318 Baguñà J. 1976. Mitosis in the intact and regenerating planarian *Dugesia mediterranea* n.sp. I.  
319 Mitotic studies during growth, feeding and starvation. *J Exp Zool* **195**:53–64.
- 320 Baguñà J. 1974. Dramatic mitotic response in planarians after feeding, and a hypothesis for the  
321 control mechanism. *J Exp Zool* **190**:117–122.
- 322 Baguñà J, Romero R. 1981. Quantitative analysis of cell types during growth, degrowth and  
323 regeneration in the planarians *Dugesia mediterranea* and *Dugesia tigrina*. *Hydrobiologia*  
324 **84**:181–194.
- 325 Baguñà J, Romero R, Saló E, Collet J, Auladell C, Ribas M, Riutort M, García-Fernàndez J, Burgaya  
326 F, Bueno D. 1990. Growth, degrowth and regeneration as developmental phenomena in  
327 adult freshwater planarians In: Marthy H, editor. *Experimental Embryology in Aquatic*  
328 *Plants and Animals*. Boston, MA: Springer US. pp. 129–162.
- 329 Bender CE, Fitzgerald P, Tait SWG, Llambi F, McStay GP, Tupper DO, Pellettieri J, Sánchez  
330 Alvarado A, Salvesen GS, Green DR. 2012. Mitochondrial pathway of apoptosis is ancestral  
331 in metazoans. *Proc Natl Acad Sci U S A* **109**:4904–4909.
- 332 Boddington MJ, Mettrick DF. 1974. The distribution, abundance, feeding habits, and population  
333 biology of the immigrant Triclad *Dugesia polychroa* (Platyhelminthes: turbellaria) in  
334 Toronto Harbour, Canada. *J Anim Ecol* **43**:681–699.
- 335 Brown DDR, Pearson BJ. 2015. One FISH, dFISH, Three FISH: Sensitive methods of whole-mount  
336 fluorescent in situ hybridization in freshwater planarians In *Situ Hybridization Methods*.  
337 Springer New York. pp. 127–150.
- 338 Calow P, Davidson AF, Woollhead AS. 2009. Life-cycle and feeding strategies of freshwater  
339 triclads: a synthesis. *J Zool* **193**:215–237.
- 340 Cheng LC, Sánchez Alvarado A. 2018. Whole-mount BrdU staining with fluorescence in situ  
341 hybridization in planarians. *Methods in Molecular Biology*. Humana Press Inc. pp. 423–434.
- 342 Cuevas-Caballé C, Riutort M, Álvarez-Presas M. 2019. Diet assessment of two land planarian  
343 species using high-throughput sequencing data. *Sci Rep* **9**:1–14.
- 344 Dattani A, Sridhar D, Aziz Aboobaker A. 2019. Planarian flatworms as a new model system for

- 345 understanding the epigenetic regulation of stem cell pluripotency and differentiation.  
346 *Semin Cell Dev Biol* **87**:79–94.
- 347 de Sousa N, Rodríguez-Esteban G, Rojo-Laguna JI, Saló E, Adell T. 2018. Hippo signaling controls  
348 cell cycle and restricts cell plasticity in planarians. *PLoS Biol* **16**:e2002399.
- 349 Evangelakou Z, Manola M, Gumeni S, Trougakos IP. 2019. Nutrigenomics as a tool to study the  
350 impact of diet on aging and age-related diseases: The Drosophila approach. *Genes Nutr*.
- 351 Fire A, Xu S, Montgomery MK, Kostas SA, Driver SE, Mello CC. 1998. Potent and specific genetic  
352 interference by double-stranded RNA in *Caenorhabditis elegans*. *Nature* **391**:806–811.
- 353 Forsthoefel DJ, Cejda NI, Khan UW, Newmark PA. 2020. Cell-type diversity and regionalized  
354 gene expression in the planarian intestine. *Elife* **9**:e52613.
- 355 Forsthoefel DJ, Park AE, Newmark PA. 2011. Stem cell-based growth, regeneration, and  
356 remodeling of the planarian intestine. *Dev Biol* **356**:445–459.
- 357 Forsthoefel DJ, Ross KG, Newmark PA, Zayas RM. 2018. Fixation, processing, and  
358 immunofluorescent labeling of whole mount planarians. *Methods in Molecular Biology*.  
359 Humana Press Inc. pp. 353–366.
- 360 Gee H, Young JO. 1993. The food niches of the invasive *Dugesia tigrina* (Girard) and indigenous  
361 *Polycelis tennis* Ijima and *P. nigra* (Müller) (Turbellaria; Tricladida) in a Welsh lake.  
362 *Hydrobiologia* **254**:99–106.
- 363 González-Estévez C, Felix DA, Rodríguez-Esteban G, Aboobaker AA. 2012. Decreased neoblast  
364 progeny and increased cell death during starvation-induced planarian degrowth. *Int J Dev*  
365 *Biol* **56**:83–91.
- 366 Gurley KA, Rink JC, Sánchez Alvarado A. 2008. Beta-catenin defines head versus tail identity  
367 during planarian regeneration and homeostasis. *Science (80- )* **319**:323–327.
- 368 Haytowitz DB, Ahuja JKC, Wu X, Somanchi M, Nickle M, Nguyen QA, Roseland JM, Williams JR,  
369 Patterson KY, Li Y, Pehrsson PR. 2019. USDA National Nutrient Database for Standard  
370 Reference, Legacy Release.
- 371 Hertel LA. 1993. Excretion and osmoregulation in the flatworms. *Trans Am Microsc Soc* **112**:10–  
372 17.
- 373 Ishii S, Sakurai T. 1991. Food ingestion by planarian intestinal phagocytic cells - a study by  
374 scanning electron microscopy. *Hydrobiologia* **227**:179–185.
- 375 Ivankovic M, Haneckova R, Thommen A, Grohme MA, Vila-Farré M, Werner S, Rink JC. 2019.  
376 Model systems for regeneration: Planarians. *Development* **146**:dev167684.
- 377 Jennings JB. 1957. Studies on feeding, digestion, and food storage in free-living flatworms  
378 (Platyhelminthes: Turbellaria). *Biol Bull* **112**:63–80.
- 379 Kang H, Alvarado AS. 2009. Flow cytometry methods for the study of cell-cycle parameters of  
380 planarian stem cells. *Dev Dyn* **238**:1111–1117.
- 381 Kapahi P, Kaeberlein M, Hansen M. 2017. Dietary restriction and lifespan: Lessons from  
382 invertebrate models. *Ageing Res Rev*.
- 383 Kimball C, Powers K, Dustin J, Poirier V, Pellettieri J. 2020. The exon junction complex is  
384 required for stem and progenitor cell maintenance in planarians. *Dev Biol* **457**:119–127.
- 385 King RS, Newmark PA. 2013. In situ hybridization protocol for enhanced detection of gene  
386 expression in the planarian *Schmidtea mediterranea*. *BMC Dev Biol* **13**:8.
- 387 Lin AYT, Pearson BJ. 2017. Yorkie is required to restrict the injury responses in planarians. *PLoS*  
388 *Genet* **13**:e1006874.

- 389 Lin AYT, Pearson BJ. 2014. Planarian yorkie/YAP functions to integrate adult stem cell  
390 proliferation, organ homeostasis and maintenance of axial patterning. *Development*  
391 **141**:1197–1208.
- 392 Lüersen K, Röder T, Rimbach G. 2019. Drosophila melanogaster in nutrition research - The  
393 importance of standardizing experimental diets. *Genes Nutr* **14**:3.
- 394 Merryman MS, Sánchez Alvarado A, Jenkin JC. 2018. Culturing planarians in the  
395 laboratory *Methods in Molecular Biology*. Humana Press Inc. pp. 241–258.
- 396 Miller CM, Newmark P a. 2012. An insulin-like peptide regulates size and adult stem cells in  
397 planarians. *Int J Dev Biol* **56**:75–82.
- 398 Newmark PA, Reddien PW, Cebria F, Sánchez Alvarado A. 2003. Ingestion of bacterially  
399 expressed double-stranded RNA inhibits gene expression in planarians. *Proc Natl Acad Sci*  
400 *U S A* **100**:11861–11865.
- 401 Newmark PA, Sánchez Alvarado A. 2002. Not your father’s planarian: a classic model enters the  
402 era of functional genomics. *Nat Rev Genet* **3**:210–219.
- 403 Newmark PA, Sánchez Alvarado A. 2000. Bromodeoxyuridine specifically labels the regenerative  
404 stem cells of planarians. *Dev Biol* **220**:142–153.
- 405 Orii H, Mochii M, Watanabe K. 2003. A simple “soaking method” for RNA interference in the  
406 planarian *Dugesia japonica*. *Dev Genes Evol* **213**:138–141.
- 407 Oviedo NJ, Newmark PA, Sánchez Alvarado A. 2003. Allometric scaling and proportion  
408 regulation in the freshwater planarian *Schmidtea mediterranea*. *Dev Dyn* **226**:326–333.
- 409 Oviedo Néstor J., Nicolas CL, Adams DS, Levin M. 2008b. Establishing and maintaining a colony  
410 of planarians. *Cold Spring Harb Protoc* **3**:896–901.
- 411 Oviedo Néstor J, Pearson BJ, Levin M, Sánchez Alvarado A. 2008a. Planarian PTEN homologs  
412 regulate stem cells and regeneration through TOR signaling. *Dis Model Mech* **1**:131–143.
- 413 Pascual-Carreras E, Marin-Barba M, Herrera C, Font-Martín D, Eckelt K, De Sousa N, García-  
414 Fernández J, Saló E, Adell T, Pascual E, Font-Martin D, Garcia-Fernandez J, Salo E. 2020.  
415 Planarian cell number depends on Blitzschnell, a novel gene family that balances cell  
416 proliferation and cell death. *Development* **147**:dev184044.
- 417 Pearson BJ, Eisenhoffer GT, Gurley KA, Rink JC, Miller DE, Alvarado AS. 2009. Formaldehyde-  
418 based whole-mount in situ hybridization method for planarians. *Dev Dyn* **238**:443–450.
- 419 Peiris TH, Weckerle F, Ozamoto E, Ramirez D, Davidian D, Garcia-Ojeda ME, Oviedo NJ. 2012.  
420 TOR signaling regulates planarian stem cells and controls localized and organismal growth.  
421 *J Cell Sci* **125**:1657–1665.
- 422 Pellettieri J, Fitzgerald P, Watanabe S, Mancuso J, Green DR, Sánchez Alvarado A. 2010. Cell  
423 death and tissue remodeling in planarian regeneration. *Dev Biol* **338**:76–85.
- 424 Petersen CP, Reddien PW. 2008. Smed-betacatenin-1 is required for anteroposterior blastema  
425 polarity in planarian regeneration. *Science (80- )* **319**:327–330.
- 426 Pickavance JR. 1971. The diet of the immigrant Planarian *Dugesia tigrina* (Girard): II. Food in the  
427 wild and comparison with some British species. *J Anim Ecol* **40**:637–650.
- 428 Postma M, Goedhart J. 2019. PlotsOfData—A web app for visualizing data together with their  
429 summaries. *PLOS Biol* **17**:e3000202.
- 430 Reddien PW. 2018. The cellular and molecular basis for planarian regeneration. *Cell* **175**:327–  
431 345.
- 432 Reddien PW, Bermange AL, Murfitt KJ, Jennings JR, Sánchez Alvarado A. 2005. Identification of

- 433 genes needed for regeneration, stem cell function, and tissue homeostasis by systematic  
434 gene perturbation in planaria. *Dev Cell* **8**:635–649.
- 435 Reynoldson TB, Sefton AD. 1976. The food of *Planaria torva* (Muller) (Turbellaria-Tricladida), a  
436 laboratory and field study. *Freshw Biol* **6**:383–393.
- 437 Reynoldson TB, Young JO. 1963. The food of four species of lake-dwelling Triclad. *J Anim Ecol*  
438 **32**:175–191.
- 439 Rink JC, Vu HTK, Alvarado AS. 2011. The maintenance and regeneration of the planarian  
440 excretory system are regulated by EGFR signaling. *Development* **138**:3769–3780.
- 441 Rouhana L, Weiss JA, Forsthoefel DJ, Lee H, King RS, Inoue T, Shibata N, Agata K, Newmark PA.  
442 2013. RNA interference by feeding in vitro synthesized double-stranded RNA to planarians:  
443 methodology and dynamics. *Dev Dyn* **242**:718–730.
- 444 Saló E, Baguñà J. 1984. Regeneration and pattern formation in planarians. I. The pattern of  
445 mitosis in anterior and posterior regeneration in *Dugesia* (G) *tigrina*, and a new proposal  
446 for blastema formation. *J Embryol Exp Morphol* **83**:63–80.
- 447 Sánchez Alvarado A, Newmark PA. 1999. Double-stranded RNA specifically disrupts gene  
448 expression during planarian regeneration. *Proc Natl Acad Sci U S A* **96**:5049–5054.
- 449 Schad EG, Petersen CP. 2020. STRIPAK limits stem cell differentiation of a WNT signaling center  
450 to control planarian axis scaling. *Curr Biol* **30**:254–263.e2.
- 451 Schindelin J, Arganda-Carreras I, Frise E, Kaynig V, Longair M, Pietzsch T, Preibisch S, Rueden C,  
452 Saalfeld S, Schmid B, Tinevez JY, White DJ, Hartenstein V, Eliceiri K, Tomancak P, Cardona  
453 A. 2012. Fiji: An open-source platform for biological-image analysis. *Nat Methods*.
- 454 Scimone ML, Srivastava M, Bell GW, Reddien PW. 2011. A regulatory program for excretory  
455 system regeneration in planarians. *Development* **138**:4387–4398.
- 456 Shibata N, Agata K. 2018. RNA interference in planarians: Feeding and injection of synthetic  
457 dsRNAMethods in Molecular Biology. Humana Press Inc. pp. 455–466.
- 458 Stubenhaus B, Pellettieri J. 2018. Detection of apoptotic cells in planarians by whole-mount  
459 TUNEL. Methods in Molecular Biology. Humana Press Inc. pp. 435–444.
- 460 Stubenhaus BM, Dustin JP, Neverett ER, Beaudry MS, Nadeau LE, Burk-McCoy E, He X, Pearson  
461 BJ, Pellettieri J. 2016. Light-induced depigmentation in planarians models the  
462 pathophysiology of acute porphyrias. *Elife* **5**:e14175.
- 463 Takeda H, Nishimura K, Agata K. 2009. Planarians maintain a constant ratio of different cell  
464 types during changes in body size by using the stem cell system. *Zoolog Sci* **26**:805–813.
- 465 Thommen A, Werner S, Frank O, Philipp J, Knittelfelder O, Quek Y, Fahmy K, Shevchenko A,  
466 Friedrich BM, Jülicher F, Rink JC. 2019. Body size-dependent energy storage causes  
467 Kleiber’s law scaling of the metabolic rate in planarians. *Elife* **8**:e38187.
- 468 Tierney AJ. 2020. Feeding, hunger, satiety and serotonin in invertebrates. *Proc R Soc B*  
469 **287**:20201386.
- 470 Tu KC, Pearson BJ, Sánchez Alvarado A. 2012. TORC1 is required to balance cell proliferation  
471 and cell death in planarians. *Dev Biol* **365**:458–469.
- 472 Vila-Farré M, Rink JC. 2018. The ecology of freshwater planariansMethods in Molecular Biology.  
473 Humana Press Inc. pp. 173–205.
- 474 Wenemoser D, Reddien PW. 2010. Planarian regeneration involves distinct stem cell responses  
475 to wounds and tissue absence. *Dev Biol* **344**:979–991.
- 476 Wulzen R, Bahrs A. 1931. Unbalance in planarian nutrition. *Physiol Zool* **4**:204–213.



- 477 Zečić A, Dhondt I, Braeckman BP. 2019. The nutritional requirements of *Caenorhabditis elegans*.  
478 *Genes Nutr* **14**.
- 479 Zhou J jun, Chun L, Liu J feng. 2019. A comprehensive understanding of dietary effects on *C.*  
480 *elegans* physiology. *Curr Med Sci* **39**:679–684.
- 481 Ziman B, Karabinis P, Barghouth P, Oviedo NJ. 2020. Sirtuin-1 regulates organismal growth by  
482 altering feeding behavior and intestinal morphology in planarians. *J Cell Sci* **133**:jcs239467.  
483

484 **TABLE AND FIGURE LEGENDS**

485

486 **Table 1. Defined diet formulations.** See Supplementary Materials and Methods for detailed  
487 protocols on the preparation of each diet.

488

489 **Figure 1. Defined diet feeding in *S. mediterranea*.** (A) Representative images of live animals  
490 photographed after a single ad libitum feeding with homogenized beef liver or defined diets.  
491 Red food coloring was added to visualize ingested food. (B) Percentage of animals that  
492 consumed each diet. Results are from three biological replicates, each of which included 25  
493 animals per condition. Feedings were administered every other day until the liver-fed animals  
494 began to fission (replicates were terminated after feedings 4, 6, and 9). Error bars show  
495 standard error. Differences between liver and each defined diet were significant at all time  
496 points (Pearson's chi-square test;  $p < 0.05$ ), except for the complex diet in feeding number 8.  
497 (C) Representative image of an animal fed liver containing 0.2% erioglaucine disodium salt  
498 (EDS). (D) The relative amount of each diet consumed in a single ad libitum feeding was  
499 determined by measuring EDS absorbance in lysates of fed animals (Materials and Methods).  
500 Each data point denotes the absorbance of a single lysate prepared from five animals, with all  
501 values expressed relative to the mean for liver. Horizontal lines denote means. Asterisks denote  
502  $p$  values  $< 5.0E-05$  for T-tests comparing liver and each defined diet. Scale bars: (A,C) = 200  $\mu\text{m}$ .

503

504 **Figure S1. Defined diet feeding in *D. japonica* and *G. dorotocephala*.** Live animals were  
505 photographed after a single ad libitum feeding with homogenized liver or defined diets. Red  
506 food coloring was added to visualize ingested food. The number of animals that consumed each  
507 diet is indicated in the lower left of each panel. Scale bars: 200  $\mu\text{m}$ .

508

509 **Figure 2. Impacts of defined diets on growth and stem cell division.** (A) Ad libitum feeding with  
510 the complex diet every other day significantly slowed the rate of degrowth. Results are from  
511 three biological replicates, each of which included 15 animals per condition. Error bars show  
512 standard deviation. Asterisks and double asterisks denote  $p$  values  $< 0.002$  and  $< 5.0E-05$ ,

513 respectively, for T-tests comparing unfed controls and animals fed with the complex diet. Liver-  
514 fed controls started to fission beyond 5 feedings and were excluded from subsequent analysis.  
515 **(B)** Representative images of H3P immunostaining in unfed controls and animals fixed 24 hours  
516 after a single feeding with the indicated diets. Scale bars = 100  $\mu\text{m}$ . **(C)** Quantitative analysis of  
517 H3P results. Data are from three biological replicates, with a minimum of 30 combined animals  
518 per condition. Boxes, whiskers, and horizontal lines denote the interquartile range (IQR), values  
519 within 1.5X the IQR, and medians, respectively. Asterisks denote p values for T-tests comparing  
520 unfed controls and animals fed with the indicated diets (single asterisk:  $p < 1\text{E-}3$ ; double  
521 asterisks:  $p < 1\text{E-}10$ ). **(D-F)** Effects of complex diet supplementation (0.5 g casein and 2.0 g  
522 dextrose per 10 ml) on rates of food consumption (D), changes in animal size (E), and stem cell  
523 division at 24 hours post-feeding (F). Relative food consumption was determined from EDS  
524 absorbance measurements (each data point indicates the absorbance of a single lysate  
525 prepared from five animals, with values expressed relative to the mean for liver). Results for  
526 animal area and H3P labeling are from three biological replicates, with a minimum of 30  
527 combined animals per condition. Horizontal lines denote means in (D) and medians in (E,F).  
528 Boxes and whiskers denote the IQR and range of values within 1.5X the IQR, respectively.  
529 Asterisks denote T-test p values for comparisons with liver-fed controls (D), 0-feeding controls  
530 (E), or unfed controls (F), except for the indicated, direct comparisons between the standard  
531 and supplemented complex diet formulations (single asterisk:  $p < 1\text{E-}3$ ; double asterisks:  
532  $p < 5\text{E-}10$ ; N.S.:  $p > 0.05$ ).

533  
534 **Figure 3. RNA interference by dsRNA delivery in defined diets. (A,B)** Regardless of food source,  
535 RNAi knockdown of *PBGD-1* via a single dsRNA feeding (A) or of  *$\beta$ -catenin-1* via six dsRNA  
536 feedings (B) prevented pigmentation of newly formed tissue and resulted in two-headed  
537 animals, respectively. Images show representative live animals subjected to head and tail  
538 amputations the day after the final feeding and photographed at 21 days post-amputation.  
539 **(C,D)** H3P immunostaining in *negative control(RNAi)* and *magoh(RNAi)* animals fixed, labeled,  
540 and photographed three days after the last of four dsRNA feedings. The quantitative analysis  
541 was based on results from three biological replicates, with a minimum of 32 combined animals

542 per condition. Boxes, whiskers, and horizontal lines denote the IQR, values within 1.5X the IQR,  
543 and medians, respectively. p values for T-tests comparing dsRNA delivery via liver and the  
544 complex diet were > 0.1 within each RNAi condition. Scale bars: (A,B) = 200  $\mu\text{m}$ ; (C) = 100  $\mu\text{m}$ .

545

546 **Figure 4. Labeling of recently fed animals. (A,B)** H3P immunostaining (A) and whole-mount in  
547 situ hybridization with a probe for the neoblast marker *smedwi-1* (B) in animals fixed at one  
548 hour post-feeding. Liver-fed animals were pre-treated and bleached with Na azide (Materials  
549 and Methods). Scale bars: (A) = 100  $\mu\text{m}$ ; (B) = 200  $\mu\text{m}$ .

550

551 **Table S1. Alternative defined diet thickeners.** Substitution of the indicated thickening agents  
552 for xanthan gum in the complex diet had no visible effect on the rate of degrowth (experiments  
553 were terminated when liver-fed controls demonstrated obvious growth).

554

555 **Table S2. Tested complex diet supplements.** Addition of the indicated compounds to the  
556 complex diet, alone or in combination, had no visible effect on the rate of degrowth  
557 (experiments were terminated when liver-fed controls demonstrated obvious growth).

558 **SUPPLEMENTARY MATERIALS AND METHODS**

559

560 **Complex Diet Preparation**

561

562 **1. Prepare AA#1 Solution**

563

a. Add to a 100 ml beaker:

564

- 0.32 g L-Valine

565

- 0.34 g L-Alanine

566

- 0.48 g L-Leucine

567

- 0.14 g L-Methionine

568

- 0.24 g L-Isoleucine

569

- 0.09 g L-Cysteine

570

b. Add RO water to 50 ml and stir until amino acids dissolve. Store at 4°C.

571

572 **2. Prepare AA#2 Solution**

573

a. Add 0.05 g L-Tyrosine to a 100 ml beaker.

574

b. Add ~40 ml RO water and bring to a boil.

575

c. Stir to dissolve and bring to final volume of 50 ml with RO water.

576

d. Bring to room temperature before using for food preparation.

577

e. Use fresh solution each time food is prepared.

578

579 **3. Prepare AA#3 Solution**

580

a. Add to a 100 ml beaker:

581

- 0.22 g L-Phenylalanine

582

- 0.17 g L-Threonine

583

- 0.41 g L-Aspartic acid

584

- 0.70 g L-Glutamic acid monosodium salt hydrate

585

- 0.35 g Glycine

586

- 0.25 g L-Proline

587

- 0.20 g L-Serine

588

- 0.06 g L-Glutamine

589

- 0.13 g L-Histidine

590

- 0.41 g L-Lysine monohydrochloride

591

- 0.34 g L-Arginine monohydrochloride

592

- 0.05 g L-Tryptophan

593

- 0.04 g L-Asparagine

594

b. Add RO water to 50 ml and stir until amino acids dissolve. Store at 4°C.

595

596 **4. Prepare Dextrose Solution**

597

a. Add 21.70 g dextrose to a 100 ml beaker.

598

b. Add ~40 ml RO water and bring to a boil.

599

c. Stir to dissolve and bring to final volume of 50 ml with RO water.

600

d. Bring to room temperature before using for food preparation. Store at 4°C.

601 **5. Prepare Xanthan Gum Solution\***

602 a. Add 0.25 g xanthan gum to a 15 ml conical tube.

603 b. Add RO water to 15 ml and vortex thoroughly to mix.

604 \* Note: other thickeners can be substituted if desired (see Table S2).

605

606 **6. Prepare Food**

607 a. Add to a 50 ml conical tube:

608 • 0.70 g lecithin (use waxed weighing paper)

609 • 2,316  $\mu$ l AA#1 Solution

610 • 1,000  $\mu$ l AA#2 Solution

611 • 3,184  $\mu$ l AA#3 Solution

612 • 50  $\mu$ l Dextrose Solution

613 b. Vortex thoroughly to mix.

614 c. Add 0.30 g glycogen and 0.5 ml RO water.

615 d. Vortex thoroughly to mix.

616 e. Adjust pH to 6.9-7.0 with 1M NaOH.

617 f. Add 1.5 ml xanthan gum solution.

618 g. Bring to final volume of 10 ml with RO water.

619 h. Vortex thoroughly to mix. Aliquot and store at -20°C.

620

621

622 **Minimal Diet Preparation**

623

624 **1. Prepare Xanthan Gum Solution\***

625 a. Add 0.25 g xanthan gum to a 15 ml conical tube.

626 b. Add 15 ml RO water and vortex thoroughly to mix.

627 \* Note: other thickeners can be substituted if desired (see Table S2).

628

629 **2. Prepare Food**

630 a. Add 0.70 g lecithin to a 50 ml conical tube (use waxed weighing paper).

631 b. Add 8 ml RO water and vortex thoroughly to mix.

632 c. Adjust pH to 6.9-7.0 with 1M NaOH.

633 d. Add 1.5 ml xanthan gum solution.

634 e. Bring to final volume of 10 ml with RO water.

635 f. Vortex thoroughly to mix. Aliquot and store at -20°C.

## Table 1

### COMPLEX DIET

| Compound                                 | Vendor            | Catalog No. | g per 10 ml |
|------------------------------------------|-------------------|-------------|-------------|
| L-Valine                                 | Acros Organics    | 140810250   | 0.015       |
| L-Alanine                                | Acros Organics    | 102831000   | 0.016       |
| L-Leucine                                | Sigma-Aldrich     | L8912       | 0.022       |
| L-Methionine                             | Sigma-Aldrich     | M9625       | 0.006       |
| L-Isoleucine                             | Acros Organics    | 166170250   | 0.011       |
| L-Cysteine                               | Sigma-Aldrich     | C7352       | 0.004       |
| L-Tyrosine                               | Sigma-Aldrich     | T3754       | 0.001       |
| L-Phenylalanine                          | Acros Organics    | 130311000   | 0.014       |
| L-Threonine                              | Acros Organics    | 138930250   | 0.011       |
| L-Aspartic acid                          | Fisher Scientific | BP374       | 0.026       |
| L-Glutamic acid, monosodium salt hydrate | Sigma-Aldrich     | G5889       | 0.045       |
| Glycine                                  | Sigma-Aldrich     | G7126       | 0.022       |
| L-Proline                                | Sigma-Aldrich     | P0380       | 0.016       |
| L-Serine                                 | Acros Organics    | 132661000   | 0.013       |
| L-Glutamine                              | Sigma-Aldrich     | G3126       | 0.004       |
| L-Histidine                              | Acros Organics    | 166150250   | 0.008       |
| L-Lysine monohydrochloride               | Alfa Aesar        | J62099      | 0.026       |
| L-Arginine monohydrochloride             | Sigma-Aldrich     | A5131       | 0.022       |
| L-Tryptophan                             | Acros Organics    | 140590250   | 0.003       |
| L-Asparagine                             | Acros Organics    | 371601000   | 0.003       |
| Dextrose                                 | Fisher Scientific | D16         | 0.022       |
| Glycogen                                 | BioBasic          | GB0301      | 0.300       |
| Egg yolk lecithin                        | Sigma-Aldrich     | P5394       | 0.700       |
| Xanthan gum                              | Sigma-Aldrich     | G1253       | 0.025       |

### MINIMAL DIET

| Compound          | Vendor        | Catalog No. | g per 10 ml |
|-------------------|---------------|-------------|-------------|
| Egg yolk lecithin | Sigma-Aldrich | P5394       | 0.700       |
| Xanthan gum       | Sigma-Aldrich | G1253       | 0.025       |

## Figure 1

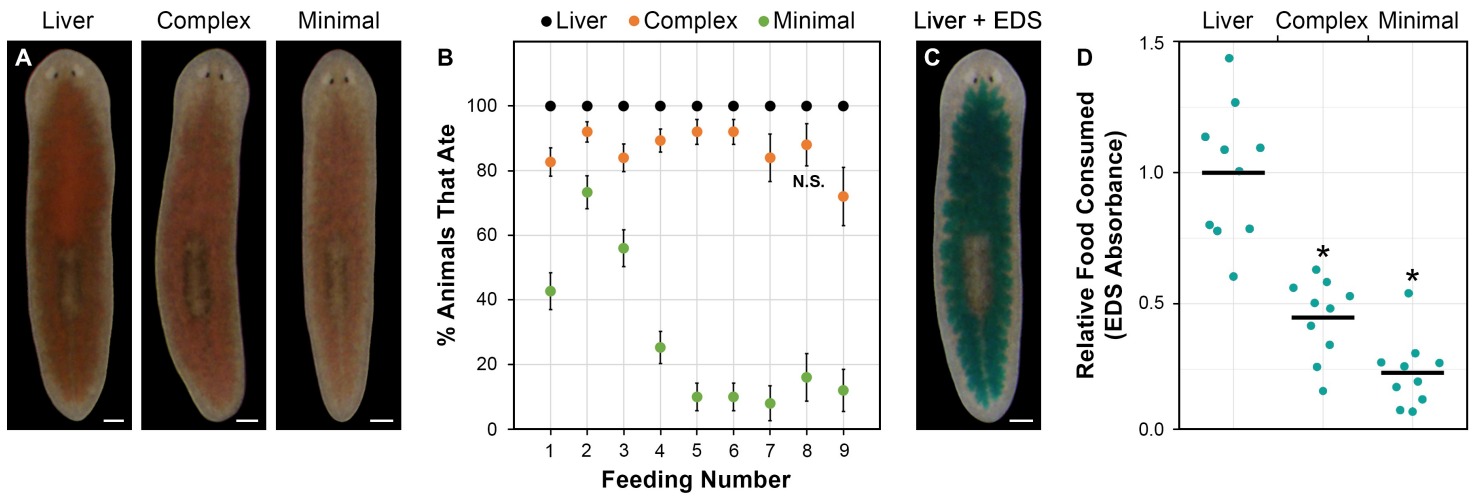

## Figure S1

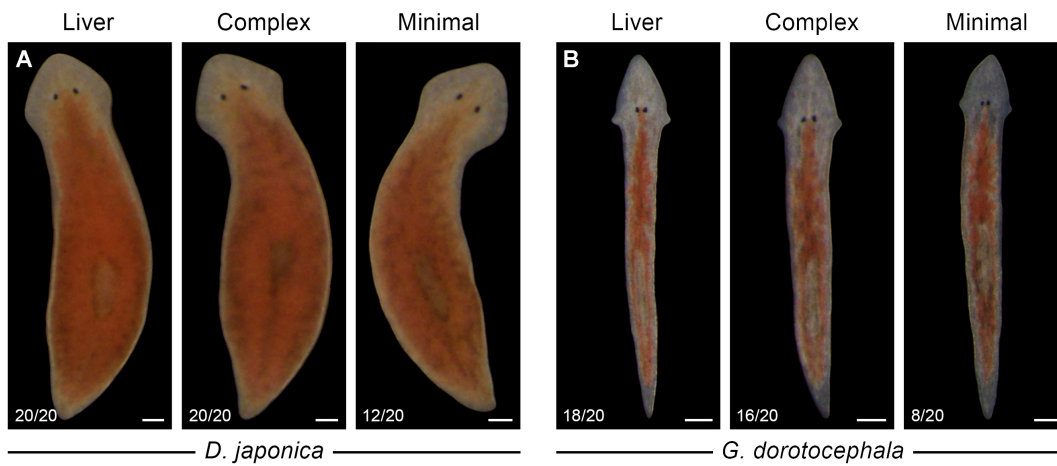



## Figure 2

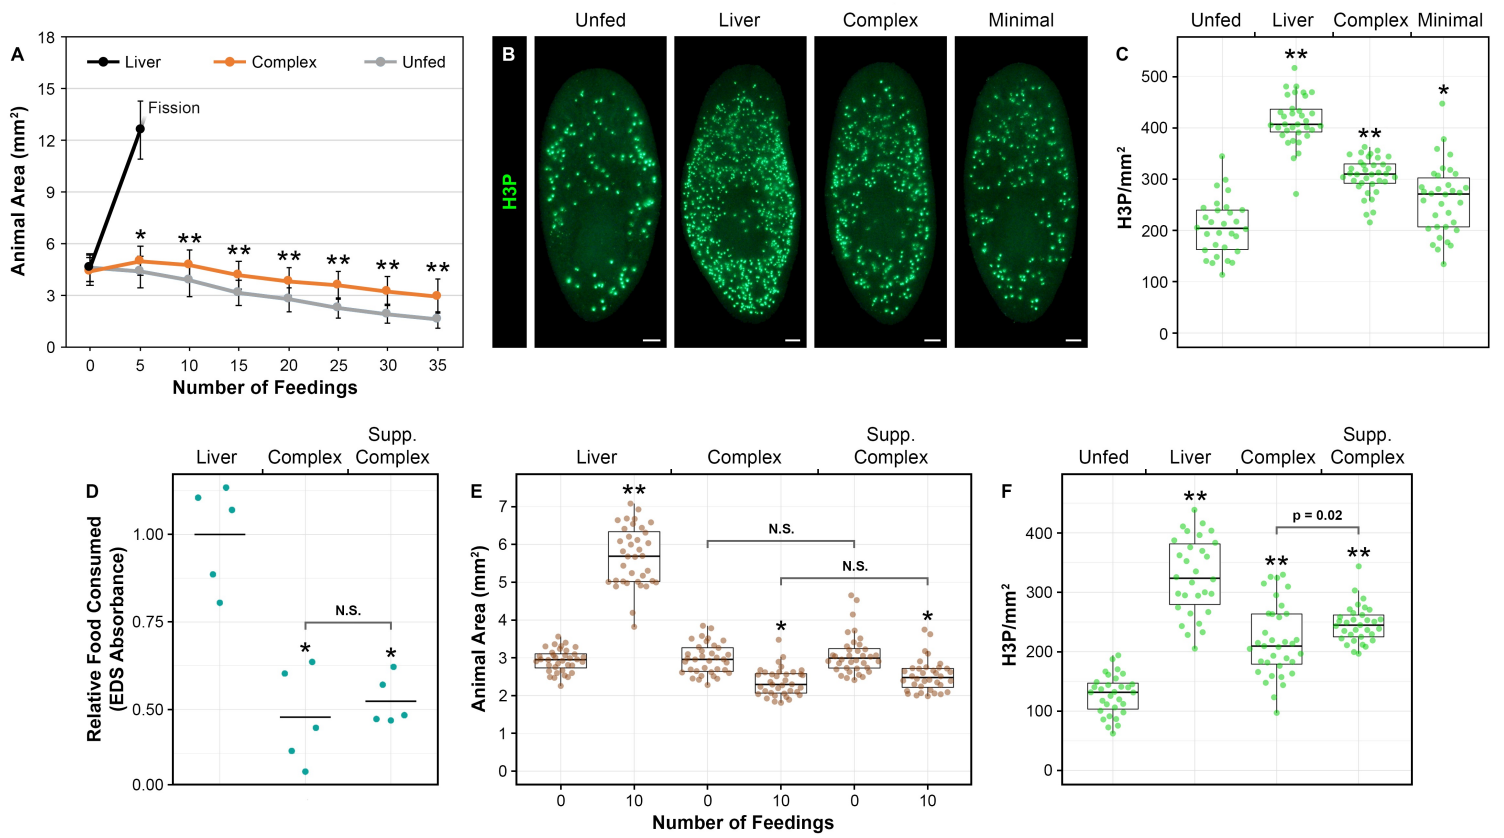

### Figure 3

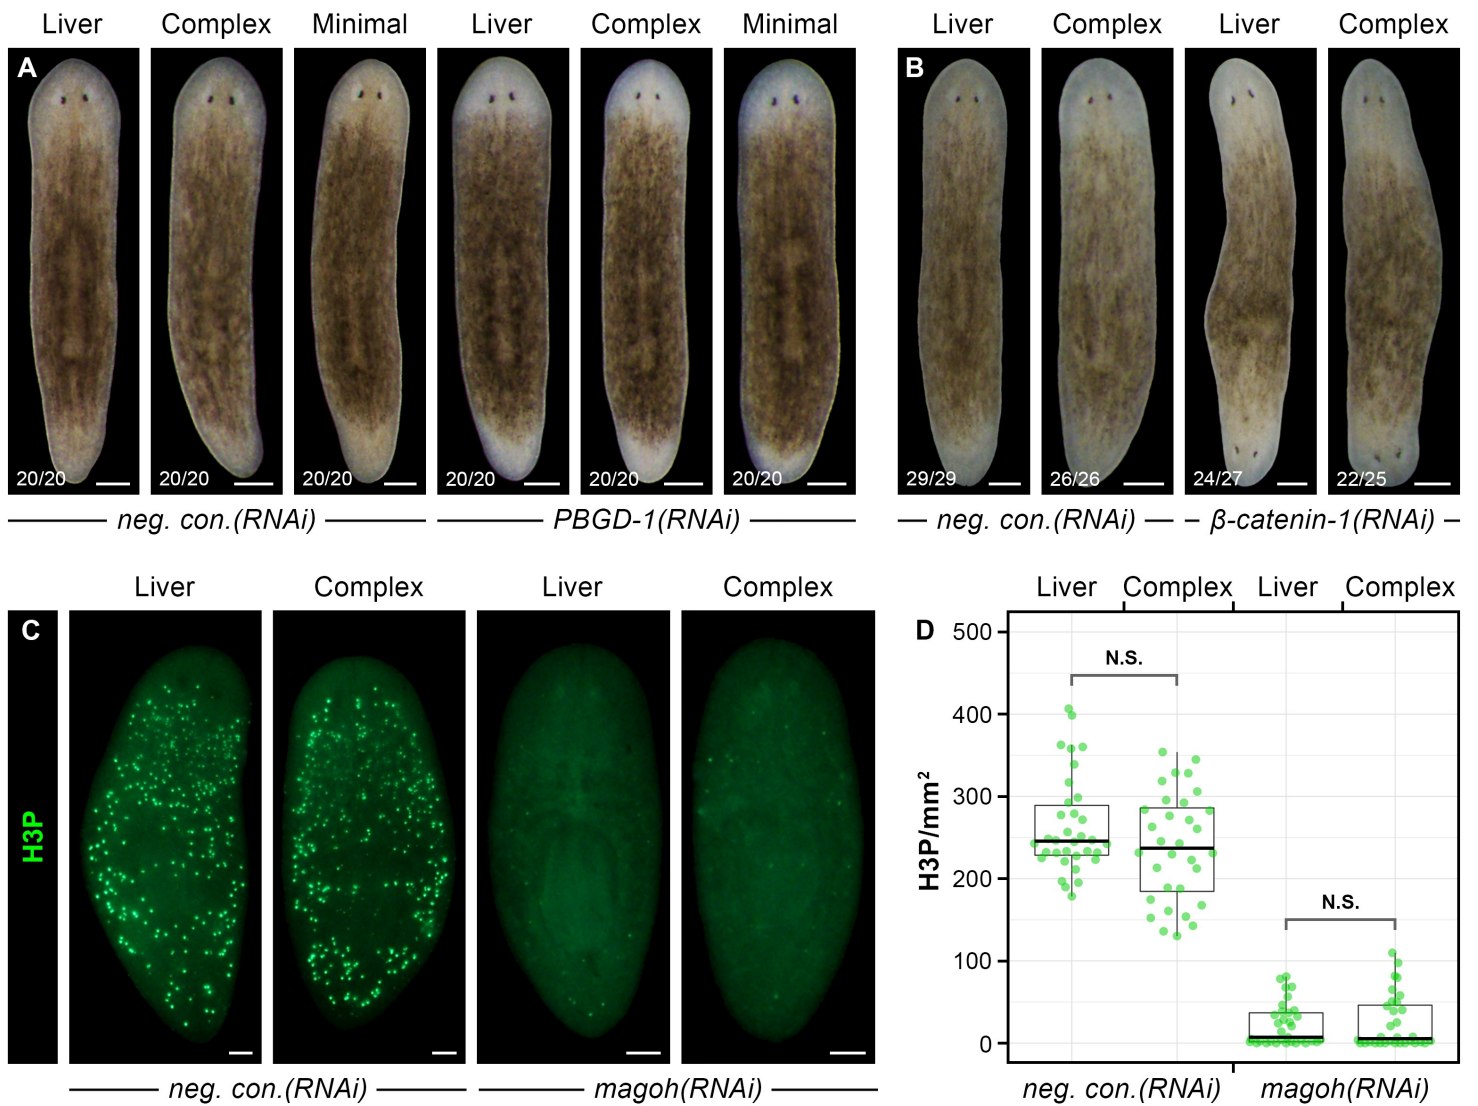

## Figure 4

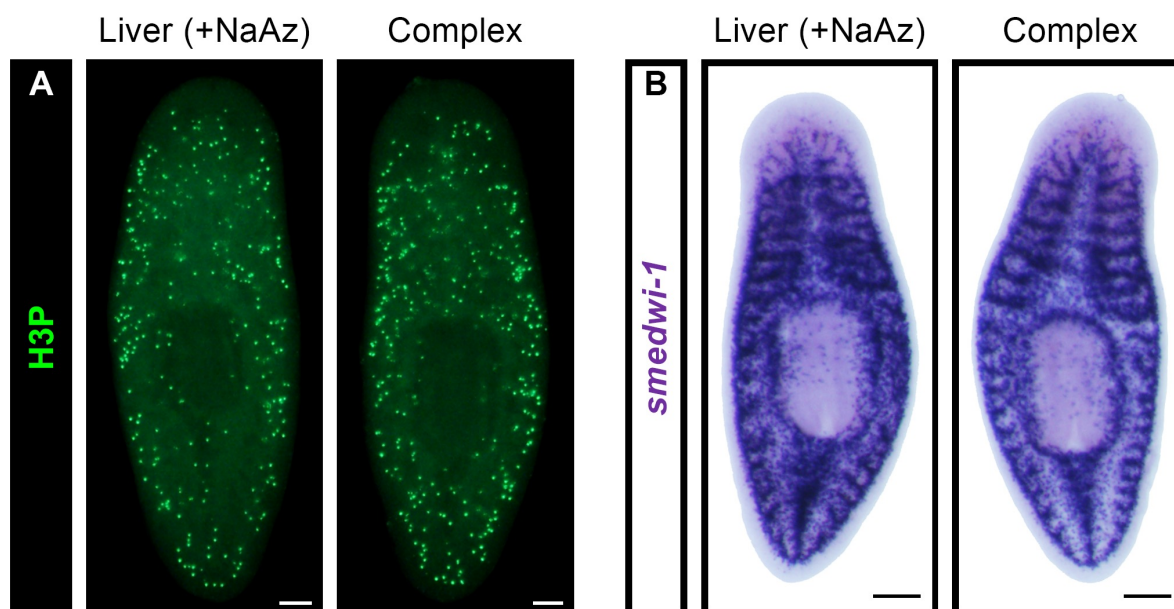

## Table S1

### DEFINED DIET THICKENERS

| Compound                      | Vendor                 | Catalog No. | g per 10 ml |
|-------------------------------|------------------------|-------------|-------------|
| Xanthan gum                   | Sigma-Aldrich          | G1253       | 0.025       |
| Agarose                       | Sigma-Aldrich          | A6013       | 0.050       |
| Starch                        | Sigma-Aldrich          | S9765       | 1.500       |
| Methylcellulose               | Sigma-Aldrich          | M0512       | 0.025       |
| Carboxymethylcellulose sodium | Spectrum Chemical      | CA192       | 0.100       |
| Polyethylene glycol 8000      | Mallinckrodt Chemicals | 7755-61     | 0.900       |
| Alginic acid, sodium salt     | Acros Organics         | 177770050   | 0.100       |

## Table S2

### COMPLEX DIET SUPPLEMENTS

| Compound                                  | Vendor                   | Catalog No. | g per 100 ml |
|-------------------------------------------|--------------------------|-------------|--------------|
| Potassium phosphate monobasic             | Fisher Scientific        | BP362       | 0.0500       |
| Magnesium sulfate heptahydrate            | Sigma-Aldrich            | 230391      | 0.0100       |
| Sodium chloride                           | Bio Basic                | SB0476      | 0.0010       |
| Calcium chloride dihydrate                | Bio Basic                | CD0050      | 0.0010       |
| Ammonium iron (III) sulfate dodecahydrate | Acros Organics           | 205881000   | 0.0010       |
| Copper (II) chloride dihydrate            | Acros Organics           | 405840050   | 0.0010       |
| Manganese (II) chloride tetrahydrate      | Sigma-Aldrich            | M3634       | 0.0010       |
| Zinc chloride                             | Acros Organics           | 196840050   | 0.0010       |
| L-Ascorbic acid                           | Fisher Scientific        | A61         | 0.0100       |
| D-Calcium pantothenate                    | Acros Organics           | 243300050   | 0.0010       |
| Cyanocobalamin                            | Alfa Aesar               | A14894      | 0.0010       |
| Adenosylcobalamin                         | Cayman Chemical          | 21571       | 0.0010       |
| Pyridoxine hydrochloride                  | Alfa Aesar               | A12041      | 0.0010       |
| Riboflavin 5' phosphate sodium dihydrate  | Alfa Aesar               | J66949      | 0.0010       |
| Thiamine hydrochloride                    | Acros Organics           | 148990100   | 0.0010       |
| Nicotinic acid                            | Acros Organics           | 128291000   | 0.0010       |
| Lipoic acid                               | Acros Organics           | 138720050   | 0.0010       |
| D-Biotin                                  | Acros Organics           | 230090010   | 0.0010       |
| Folic acid                                | Acros Organics           | 216630100   | 0.0010       |
| Beta carotene                             | Sigma-Aldrich            | C9750       | 0.0010       |
| Retinol acetate                           | MP Biomedicals           | 103257      | 0.0010       |
| Cholecalciferol                           | Alfa Aesar               | B22524      | 0.0001       |
| Palmitic acid                             | TCI America              | P0002       | 0.0010       |
| Stearic acid                              | TCI America              | S0163       | 0.0010       |
| Cholic acid                               | Chem-Impex               | 00071       | 0.0010       |
| Cholesterol                               | Sigma-Aldrich            | C8667       | 0.0010       |
| RNA from torula yeast                     | Sigma-Aldrich            | R6625       | 0.0200       |
| DNA, sodium salt from salmon sperm        | GoldBio                  | D-112       | 0.0100       |
| Betaine                                   | Alfa Aesar               | B24397      | 0.0100       |
| L-Carnitine                               | Acros Organics           | 241040010   | 0.0100       |
| N-Acetylglucosamine                       | Alfa Aesar               | A13047      | 0.0100       |
| Choline chloride                          | Acros Organics           | 110295000   | 0.0050       |
| Myo-inositol                              | Sigma-Aldrich            | I7508       | 0.0050       |
| Cytochrome C                              | Sigma-Aldrich            | C2506       | 0.0010       |
| Hemin chloride                            | Sigma-Aldrich            | 3741        | 0.0001       |
| DL-Alpha tocopherol                       | Santa Cruz Biotechnology | sc-294383   | 0.0095       |
| Alpha linoleic acid                       | Cayman Chemical          | 90210       | 0.0075       |
| Oleic acid                                | Alfa Aesar               | 31997       | 0.0089       |
| Linoleic acid                             | Beantown Chemical        | 129310      | 0.0090       |
| Selenium                                  | Ultra Scientific         | IAA-234     | 0.0005       |
